# Supplementary material
Source: PubMed Central journal article supplement (PMC5889040)
Supplement: kwx250tobiaswebmaterialfinal.pdf [file kwx250tobiaswebmaterialfinal.pdf]

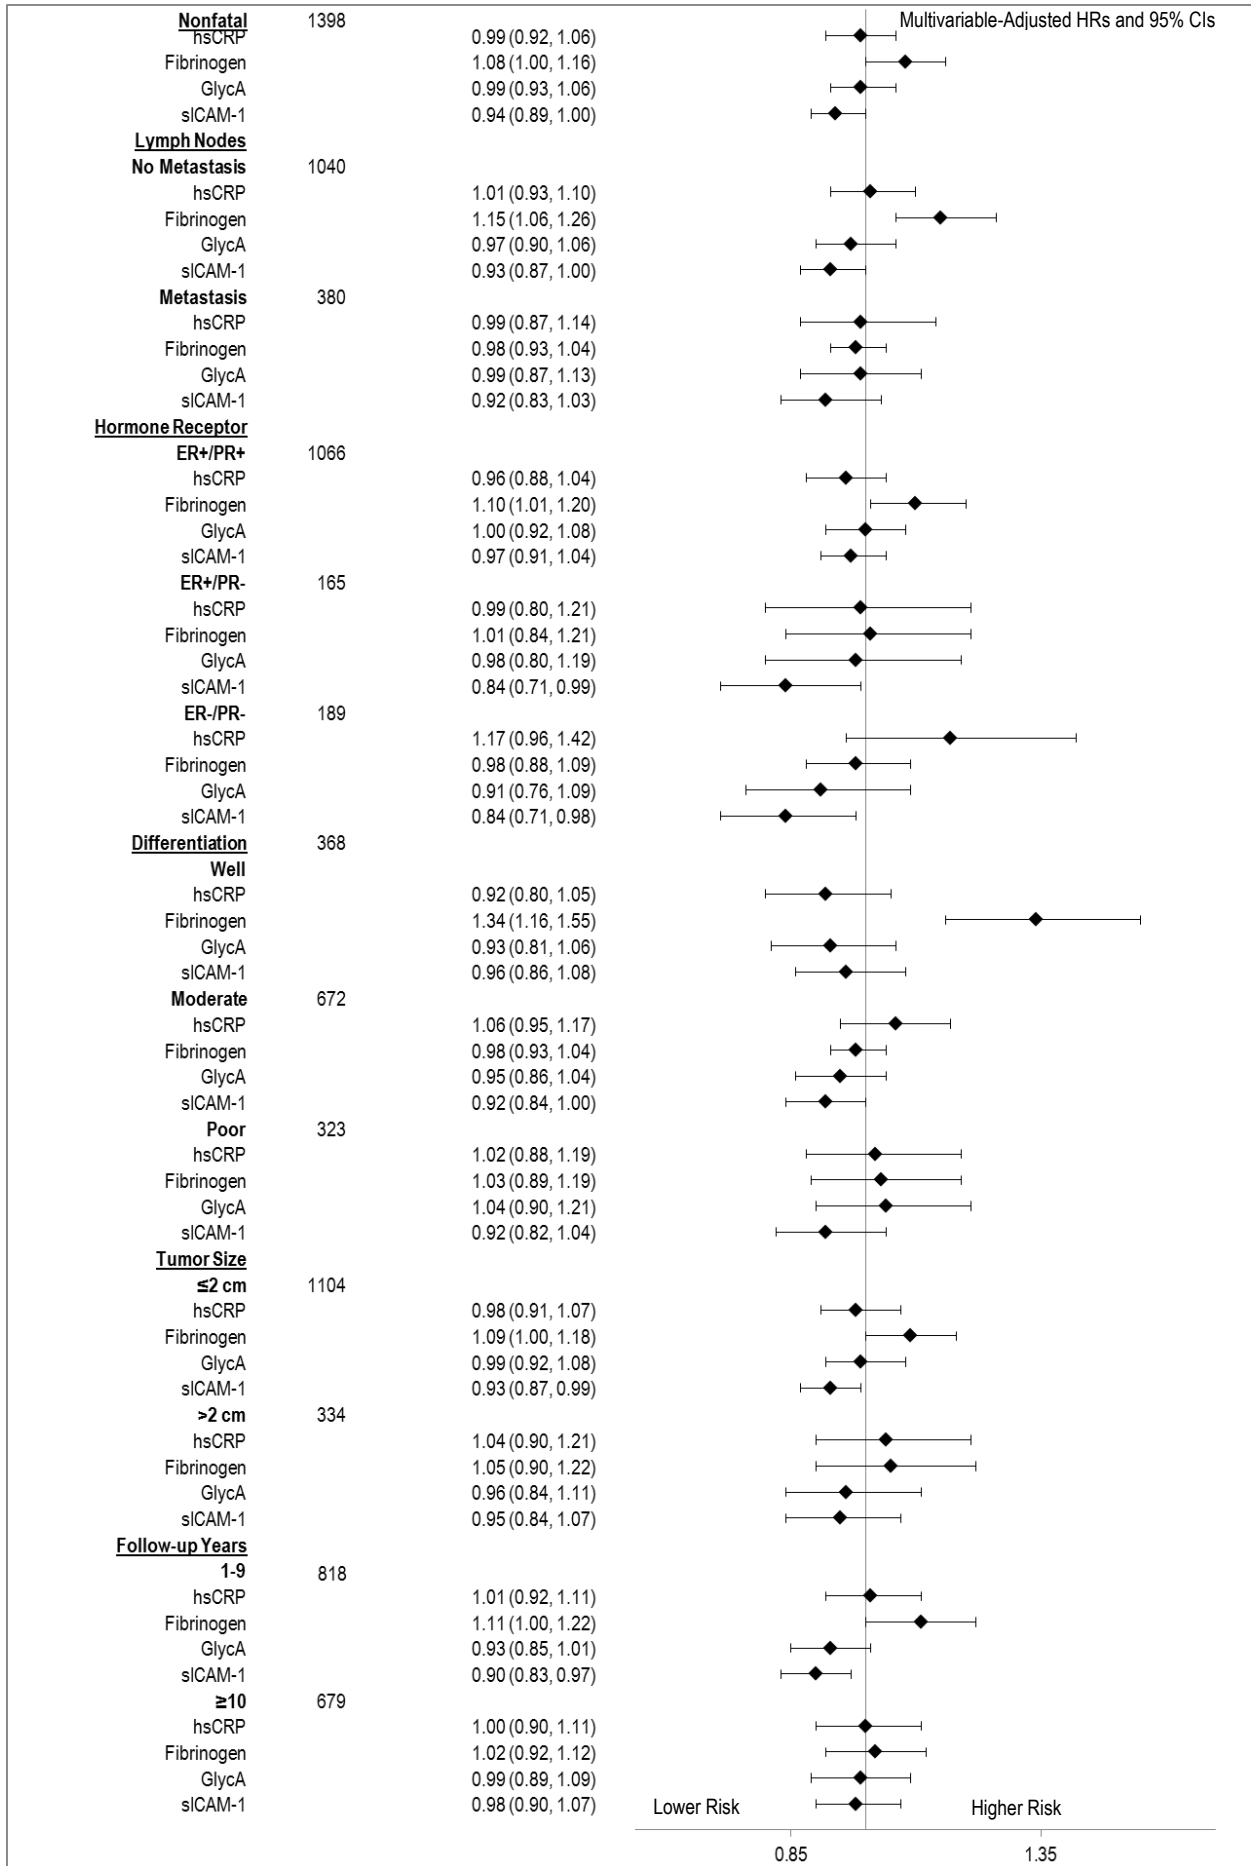

**Web Figure 1.** Multivariable Cox proportional hazards models for biomarkers of inflammation and risk of incident breast cancer by breast cancer subtypes in the Women's Health Study (1993-2013). Point estimates and bars represent hazard ratios and 95% confidence intervals. Abbreviations: HR=hazard ratio, CI=confidence interval, hsCRP=high sensitivity C-reactive protein, GlycA=N-linked glycoproteins, sICAM-1=soluble intercellular adhesion molecule-1, ER=estrogen receptor, PR=progesterone receptor. Estimates are from multivariable models adjusted for age, treatment randomization, family history of breast cancer in a relative <60 years of age (yes/no), personal history of benign breast disease (yes/no), Caucasian race/ethnicity (yes/no), menopausal status (premenopausal, postmenopausal, unsure), hormone therapy use (never, past, current), type of most recent hormone therapy use among ever users (estrogen alone, estrogen plus progestogen, other), age at menarche ( $\leq 11$  years, 12, 13,  $\geq 14$ ), parity (nulliparous, 1-2 pregnancies  $\geq 6$  months, 3-4,  $\geq 5$ ), age at first birth (nulliparous, <30 years,  $\geq 30$ ), oral contraceptive use (never/ever), mammography screening (yes/no), Alternative Healthy Eating Index 2010 (quartiles), physical activity (metabolic equivalent task-hours [MET-hours]/week, quartiles), usual alcohol intake (rarely/never, 1-3 drinks/month, 1-6 drinks/week,  $\geq 1$  drink/day), smoking status (never, past, current), body mass index (<18.5 kg/m<sup>2</sup>, 18.5-19.9, 20.0-22.4, 22.5-24.9, 25.0-27.4, 27.5-29.9, 30.0-34.9,  $\geq 35.0$ ), and the other biomarkers presented in the figure. The standard deviations for log-transformed concentrations of hsCRP = 1.20, fibrinogen = 0.25, GlycA = 0.18, and sICAM-1 = 0.22.
